# Supplementary material
Source: PubMed Central journal article supplement (PMC5087748)
Supplement: 10.1074_M116.750570_jbc.M116.750570-1.pdf [file 10.1074_M116.750570_jbc.M116.750570-1.pdf]

## Supplementary Information

### Supplementary Figures 1-9, Supplementary Tables 1-5

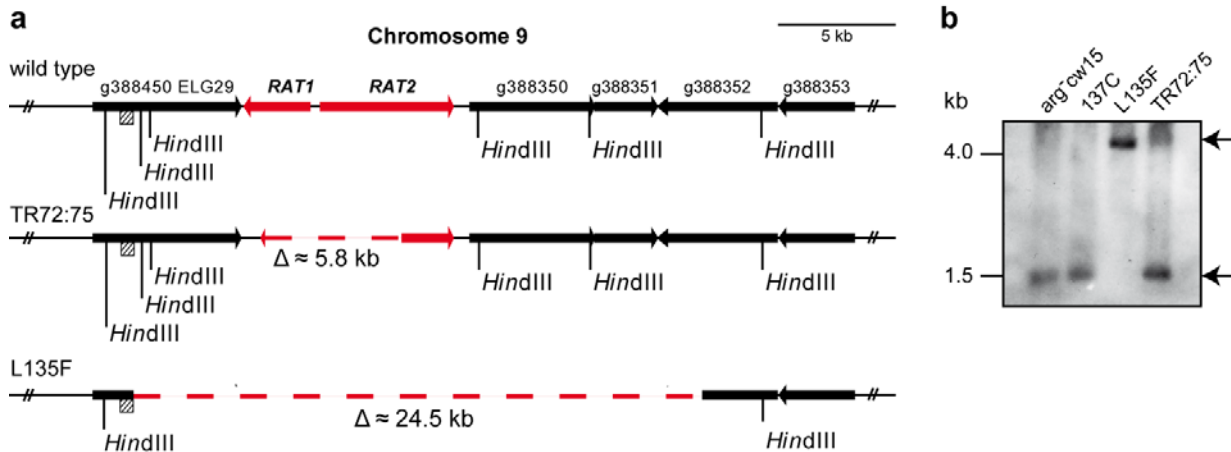

**Supplementary Figure 1: Southern analysis of two wild type strains (arg-cw15, 137C) and two allelic mutants (TR72:75, L135F).** (a) Comparative physical map of the *RAT2* locus and flanking regions in wild type (arg-cw15 and 137C) and the two allelic mutant strains TR72:75 and L135F. The probe used for hybridization is shown as dashed box. (b) Southern blot of gDNA digested with *Hind*III from arg-cw15, 137C, L135F, and TR72:75. Hybridization with a radioactively labeled PCR fragment revealed that several *Hind*III restriction sites are deleted in mutant L135F, leading to a 4 kb signal in Southern analysis compared to an 1.5 kb signal that represents the wild type situation.

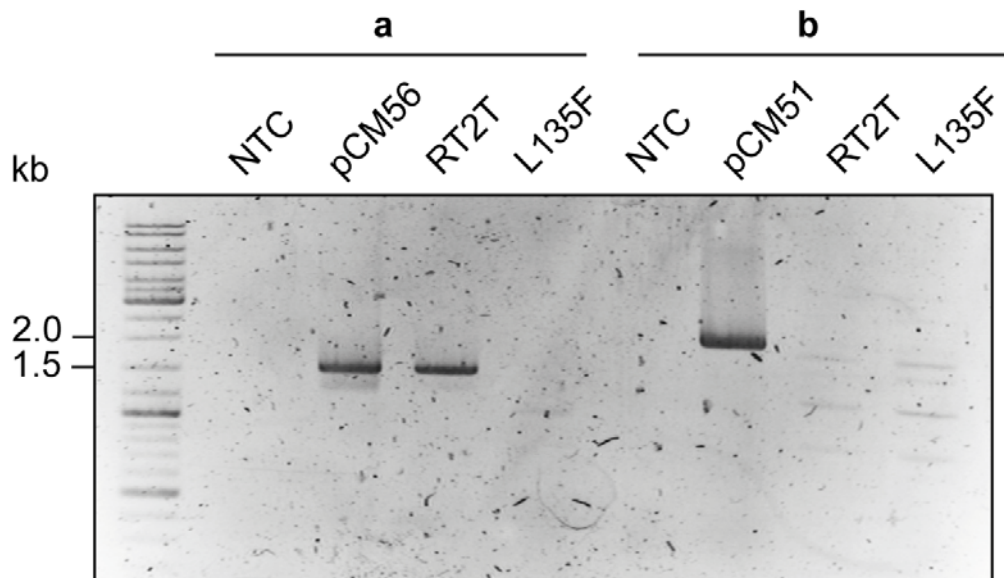

**Supplementary Figure 2: PCR analysis of a *RAT2::TAP* transformant RT2T by PCR.** (a) Genomic integration of the *RAT2::TAP* fusion gene of transformant RT2T was verified by PCR with gDNA as template using *TAP-tag*- and *RAT2* exon 9-specific primers. Isolated gDNA of mutant strain L135F served as negative control, whereas plasmid pCM56 was used as positive control. (b) Deletion of *RAT1* gene in mutant strain L135F and transformant RT2T was verified using *RAT1* specific primers. Plasmid pCM51 served as positive control. NTC = no template control.

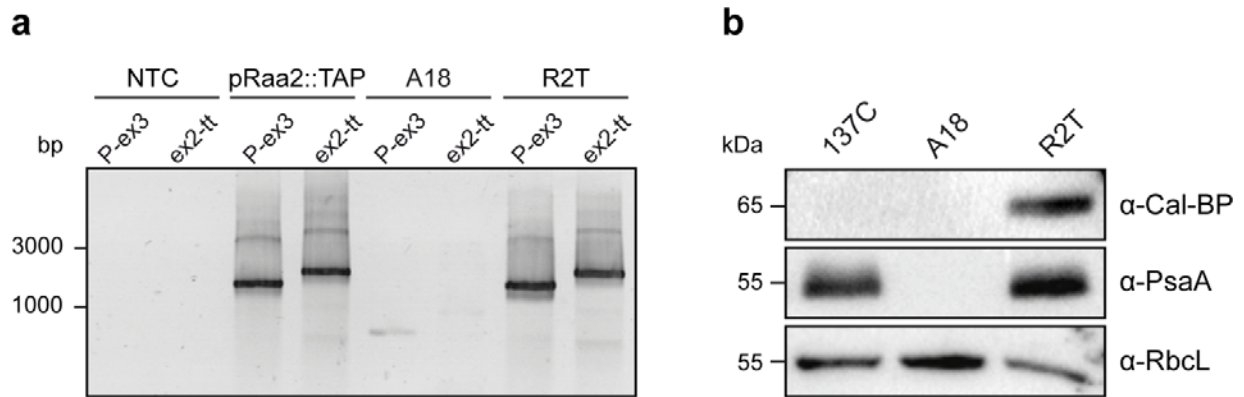

**Supplementary Figure 3: Molecular characterization of strain R2T.** For TAP experiments, *RAA2* was fused upstream of the *TAP* sequence and mutant A18 was transformed with pRaa2::TAP. **(a)** Genomic integration of the *RAA2::TAP* construct in transformant R2T was verified by amplification of promoter-gene fragments (P-ex3, primers: for\_Ch11 and rev\_Raa2\_Ex3) and gene-TAP fragments (ex2-tt, primers: for\_Raa2\_Ex2 and taptag2). **(b)** Immunodetection of Raa2::TAP fusion protein, PsaA, and RbcL in wild type, mutant  $\Delta$ *raa2*, and R2T strain proved the expression of Raa2::TAP in R2T and photosynthetic restoration. Abbreviation: ctrl, control; P, promoter; ex, exon; tt, TAP-tag.

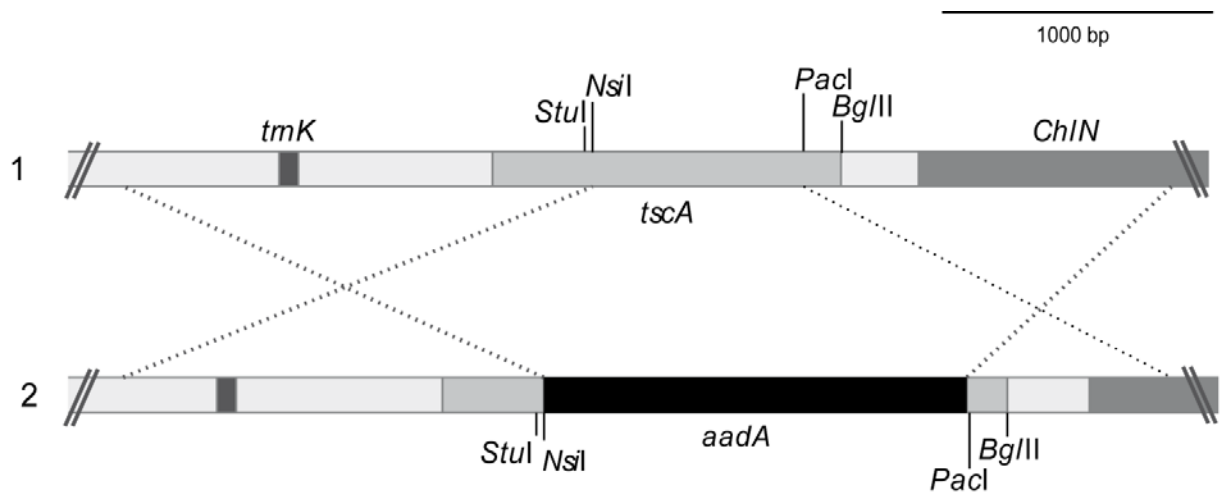

**Supplementary Figure 4: Deletion of chloroplast *tscA* locus by homologous recombination.** Physical map of the *tscA* locus and flanking regions (1). After transformation, the main part of the *tscA* gene is replaced by an *aadA* resistance cassette (2). For gene disruption the *aadA* resistance cassette was integrated via *StuI* and *PacI* restriction sites into plasmid pCM57.

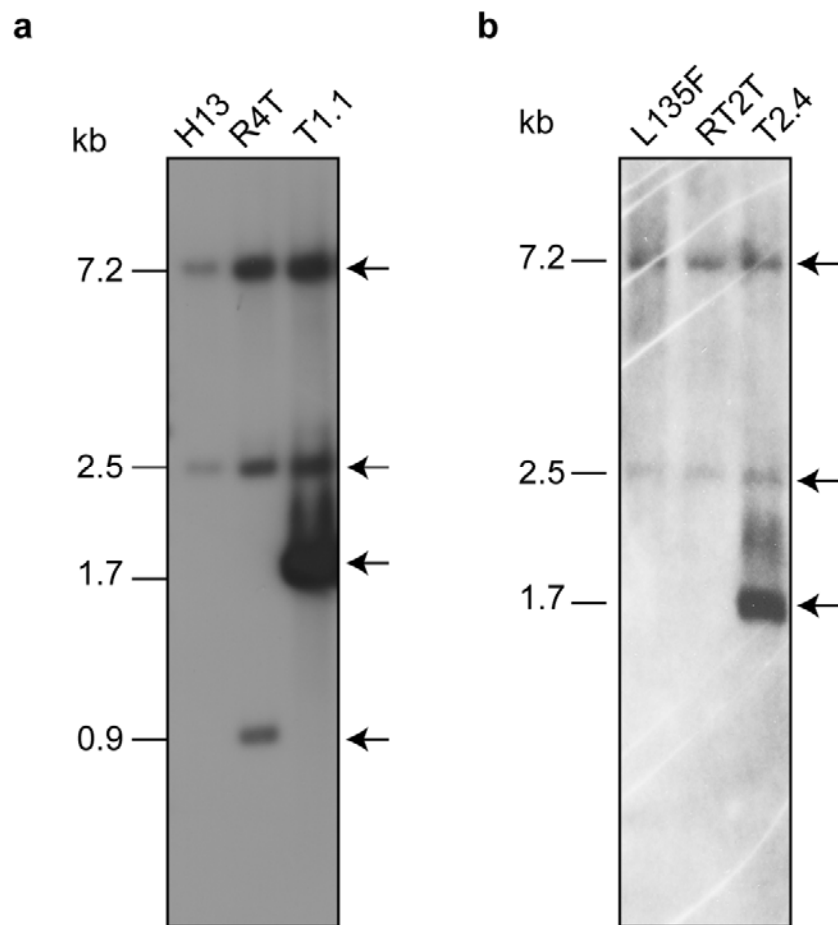

**Supplementary Figure 5: Southern hybridization confirms deletion of the *tscA* gene in R4T and RT2T.** (a) Total DNA from mutant strain H13, parental strain R4T, and several transformants was digested with *Nsi*I and *Bgl*II. A *Bgl*II and *Nsi*I restriction fragment of pCM59 was used as a 5' *psbD*-*aadA*-3' *rbcL*-*tscA* probe and revealed a 0.9 kb signal for *tscA* and an 1.7 kb signal for the *aadA* cassette (arrows). The 2.5 kb signal corresponds to the *psbD*, and the 7.2 kb signal to the *rbcL* locus as indicated with arrows. (b) Total DNA from mutant strain L135F, parental strain RT2T, and transformant T2.4 was digested with *Nsi*I and *Bgl*II. Southern hybridization was performed as in (a).

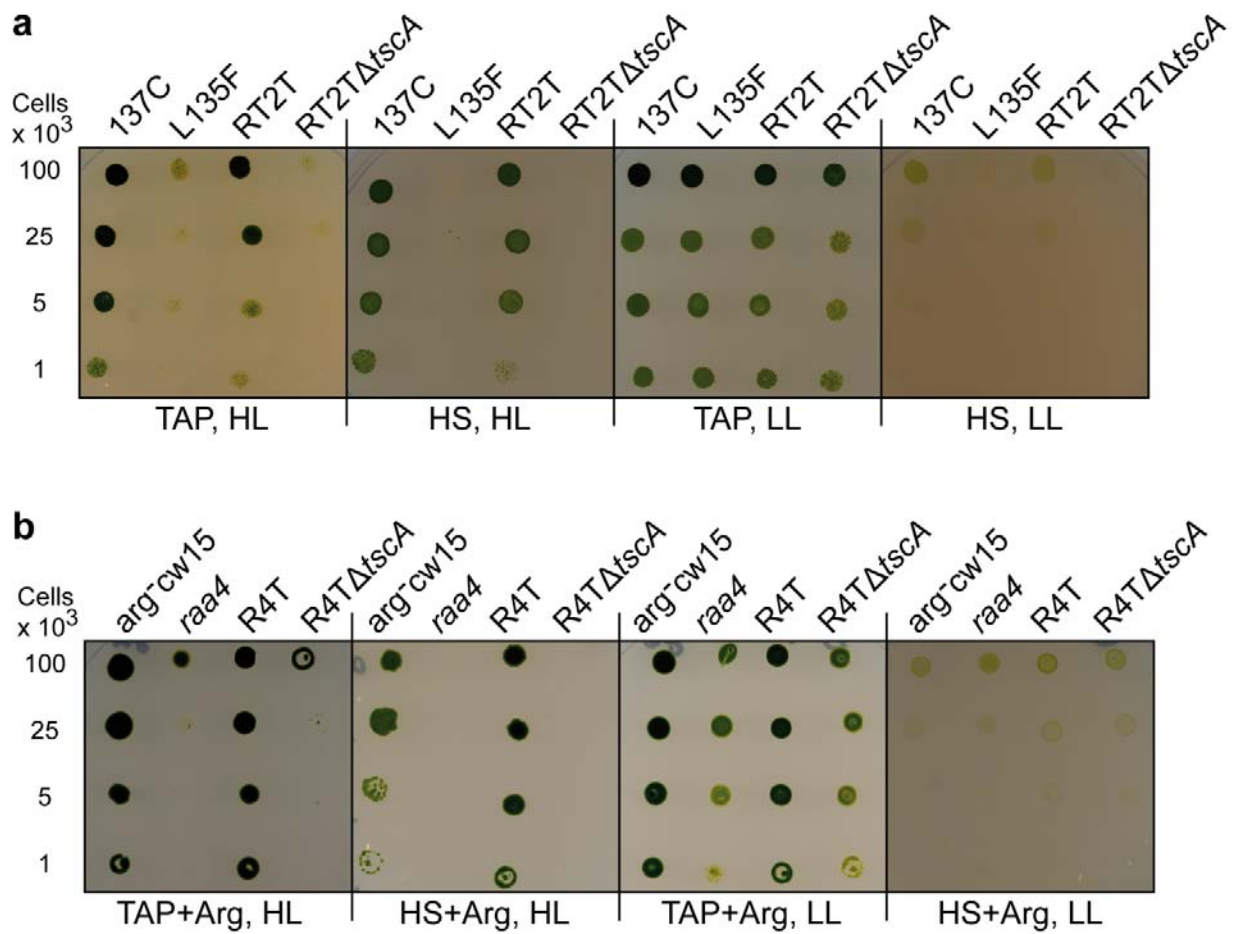

**Supplementary Figure 6: Photosynthetic defect of *tscA* deletion strains *RT2TΔtscA* and *R4TΔtscA*.** Cells were spread onto HS or TAP agar plates (for *arg-cw15* supplemented with arginine) with concentrations as indicated and incubated under high light (HL) or low light conditions (LL). (a) Wild type 137C and transformant RT2T are able to grow without acetate on HS plates under HL. Mutants L135F and RT2TΔtscA are photosynthetic deficient and can only grow on TAP plates under LL conditions. (b) Wild type *arg-cw15* and transformant R4T are able to grow without acetate on HS plates under HL, whereas mutants *raa4* and R4TΔtscA can only grow on TAP plates under LL conditions due to their photosynthetic defect.

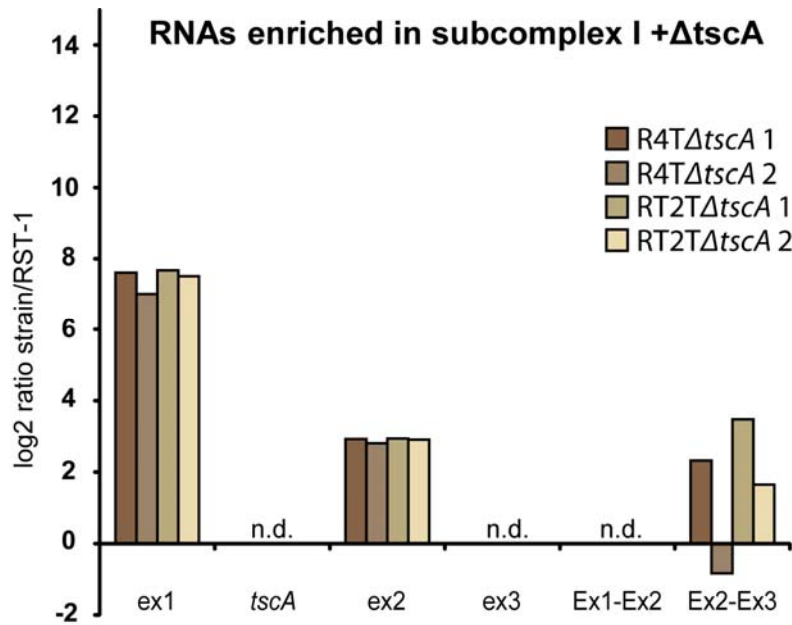

**Supplementary Figure 7: RNAs enriched in TAP eluates of Raa4::TAPΔtscA and Rat2::TAPΔtscA.** After TAP purification, RNA was precipitated and RNA levels were analyzed with qRT-PCRs. Enrichment of RNAs was determined by calculating ratios of Raa4::TAPΔtscA and Rat2::TAPΔtscA results and data obtained with the control strain RST-1. The *rml* gene was used for normalization. Primer pair specific for exon 1 precursor (ex1), exon 2 precursor (ex2), exon 3 precursor (ex3), *tscA* RNA, and partially spliced *psaA* exons (Ex1-Ex2, Ex2-Ex3) were used in these qRT-PCRs.

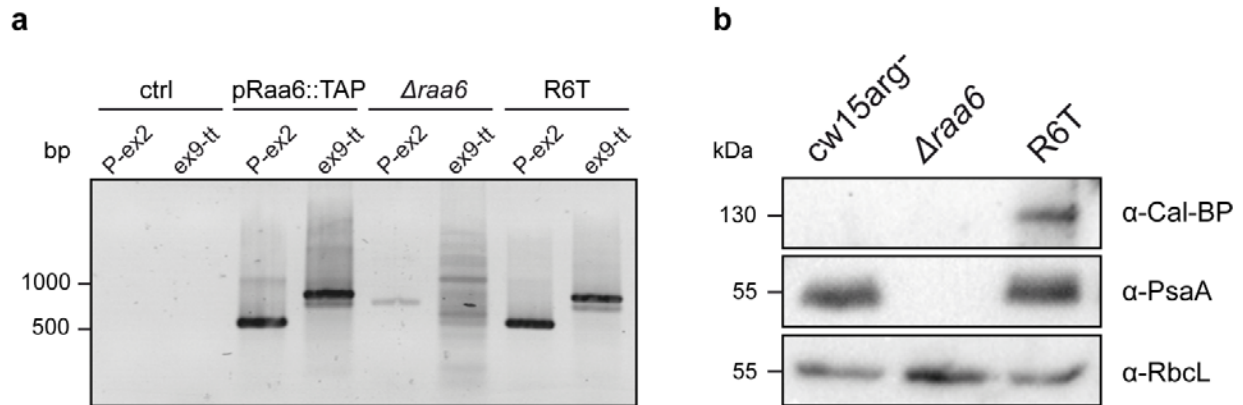

**Supplementary Figure 8: Molecular characterization of strain R6T.** For TAP experiments, gDNA of *RAA6* was fused upstream of the *TAP* sequence under control of the *HSP70::RBCS2*. Mutant  $\Delta$ raa6 was transformed with pRaa6::TAP. **(a)** Genomic integration of *RAA6::TAP* construct in transformant R6T was verified by amplification of promoter-gene fragments (P-ex2, primers: for\_Ch11 and 29701\_RT1\_rev) and gene-TAP fragments (ex9-tt, primers: OOR\_107 and tapatag2). **(b)** Immunodetection of Raa6::TAP fusion protein, PsaA, and RbcL in wild type, mutant  $\Delta$ raa6, and R6T strain proved the expression of Raa6::TAP in R6T and photosynthetic restoration. Abbreviation: ctrl, control; P, promoter; ex, exon; tt, TAP-tag.



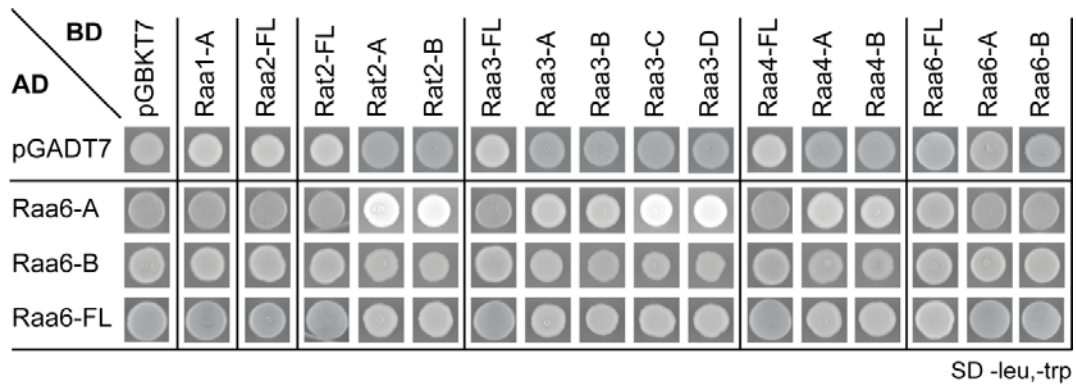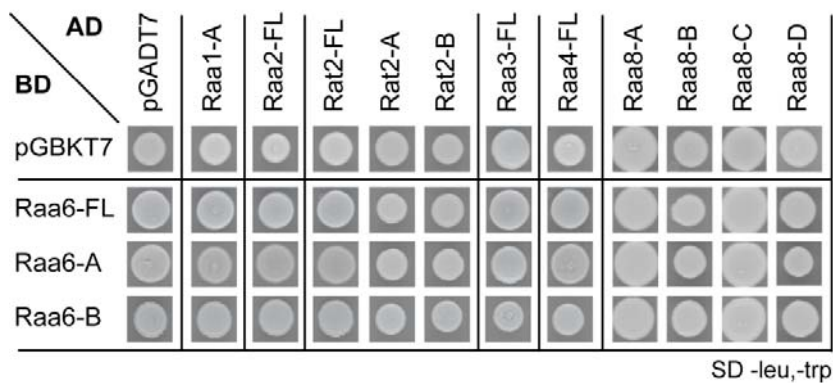

**Supplementary Figure 9: Growth control of the yeast-two hybrid analyses for detecting interaction between trans-splicing factors.** Yeast strains were co-transformed with plasmids carrying either the empty GAL4 DNA-binding domain (pGADT7) or the GAL4 activation domain plasmid pGBKT7. Transformants were grown on SD medium lacking leucine and tryptophane for the selection of both plasmids.

**Supplementary Table 1: Proteins co-purified with bait Rat2 in TAP experiments.**

| Protein                        | Description                                         | Rat2              |    |     |
|--------------------------------|-----------------------------------------------------|-------------------|----|-----|
|                                |                                                     | PSMs <sup>a</sup> |    |     |
|                                |                                                     | P1 <sup>b</sup>   | P2 | P3  |
| <i>Trans</i> -splicing factors |                                                     |                   |    |     |
| Raa1                           | <i>trans</i> -splicing factor B, OPR domains        | 55                | 47 | 52  |
| Raa3                           | <i>trans</i> -splicing factor C                     | 28                | 11 | 41  |
| Raa4                           | <i>trans</i> -splicing factor C                     | 42                | 34 | 32  |
| Raa8                           | <i>trans</i> -splicing factor C, OPR domains        | 90                | 43 | 106 |
| Rat2                           | <i>trans</i> -splicing factor C, OPR domains        | 194               | 34 | 66  |
| Not annotated                  |                                                     |                   |    |     |
| Cre10.g426450                  | no functional annotations                           | 4                 | 5  | 5   |
| Cre11.g467652                  | no functional annotations                           | 32                | 7  | 26  |
| Cre15.g643750                  | no functional annotations                           | 7                 | 10 | 8   |
| Cre16.g690655                  | no functional annotations                           | 5                 | 4  | 2   |
| Cre17.g724450                  | no functional annotations                           | 22                | 13 | 27  |
| Gene expression                |                                                     |                   |    |     |
| Cre01.g001501                  | OPR domains                                         | 35                | 16 | 22  |
| Cre06.g262650                  | OPR domains, RAP domain                             | 3                 | 14 | 4   |
| Cre17.g698750                  | OPR domains                                         | 30                | 38 | 38  |
| Cre07.g347400                  | G-patch domain                                      | 55                | 7  | 10  |
| Cre08.g373878                  | U1 snRNP-specific protein C                         | 37                | 15 | 26  |
| Cre13.g574200                  | Poly(A) polymerase, PAP2                            | 7                 | 8  | 6   |
| Others                         |                                                     |                   |    |     |
| Cre09.g387134                  | DUF 525                                             | 4                 | 5  | 3   |
| Cre12.g500550                  | calcium activated chloride channel regulator        | 19                | 5  | 3   |
| Cre13.g567100                  | D-arabinono-1,4-lactone oxidase, FAD binding domain | 9                 | 4  | 5   |
| Cre14.g610501                  | SDR34, predicted dehydrogenase                      | 28                | 7  | 11  |

<sup>a</sup> PSMs, peptide spectral matches<sup>b</sup> P, TAP purifications (P1-P3) performed with bait Rat2

**Supplementary Table 2: Proteins co-purified with bait Raa2 in TAP experiments.**

| Protein                | Description                                             | Raa2              |    |    |     |
|------------------------|---------------------------------------------------------|-------------------|----|----|-----|
|                        |                                                         | PSMs <sup>a</sup> |    |    |     |
|                        |                                                         | P4 <sup>b</sup>   | P5 | P6 | P7  |
| Trans-splicing factors |                                                         |                   |    |    |     |
| Raa1                   | <i>trans</i> -splicing factor B, OPR domains            | 13                | 22 | 22 | 158 |
| Raa2                   | <i>trans</i> -splicing factor A, pseudouridine synthase | 14                | 12 | 22 | 43  |
| Raa7                   | <i>trans</i> -splicing factor A                         | 10                | 12 | 15 | 74  |
| Not annotated          |                                                         |                   |    |    |     |
| Cre17.g728850          | no functional annotations                               | 7                 | 11 | 16 | 51  |
| Cre09.g400960          | no functional annotations                               | 3                 | 4  | 9  | 5   |
| Cre06.g252100          | no functional annotations                               | 2                 | 9  | 9  | 2   |
| Cre03.g179000          | no functional annotations                               | 2                 | 9  | 8  | 33  |
| Cre02.g095900          | no functional annotations                               | 5                 | 4  | 3  | 11  |
| Gene expression        |                                                         |                   |    |    |     |
| Cre03.g158950          | RNA recognition motif (RRM)                             | 3                 | 5  | 5  | 5   |
| Cre12.g494750          | Plastid ribosomal protein S20                           | 10                | 3  | 7  | 2   |
| Cre10.g466250          | U3 small nucleolar RNA-associated protein 21            | 30                | 33 | 28 | 57  |
| Cre10.g428678          | tRNA uridine modification enzyme                        | 6                 | 7  | 5  | 6   |
| Cre01.g022350          | DEAD/DEAH box helicase                                  | 4                 | 15 | 10 | 9   |
| Cre07.g349300          | DEAD/DEAH box helicase                                  | 3                 | 11 | 21 | 4   |
| Others                 |                                                         |                   |    |    |     |
| Cre12.g507650          | Chloroplast DnaJ-like protein                           | 6                 | 6  | 5  | 10  |
| Cre02.g147302          | Aminotransferase class I and II                         | 2                 | 3  | 6  | 5   |
| Cre06.g260850          | Nop14-like family                                       | 10                | 17 | 18 | 18  |
| Cre09.g391652          | Rad4 related protein                                    | 5                 | 8  | 12 | 9   |
| Cre02.g073200          | Threonine dehydratase                                   | 6                 | 17 | 6  | 27  |

<sup>a</sup> PSMs, peptide spectral matches<sup>b</sup> P, TAP purifications (P4-P7) performed with bait Rat2

**Supplementary Table 3: *C. reinhardtii* strains and growth conditions.**

| <b>Strain</b>             | <b>Characteristics</b>                                                                                                                                                          | <b>Growth conditions</b>                                                                                                                   | <b>References</b>                                                                                                              |
|---------------------------|---------------------------------------------------------------------------------------------------------------------------------------------------------------------------------|--------------------------------------------------------------------------------------------------------------------------------------------|--------------------------------------------------------------------------------------------------------------------------------|
| arg-cw15                  | <i>arg7</i> , <i>cw15</i> , mt <sup>-</sup> ; nuclear mutant; reduced cell wall, arginine auxotroph                                                                             | TAP medium or HS (Sueoka 1960, Gillham 1965, Gorman and Levine 1965, Harris 1989) under HL conditions, supplemented with 500 mg/l arginine | strain collection Prof. J.-D. Rochaix, Department de Biologie Moléculaire, Quai Ernest-Ansermet, Genève, Swiss; (Gillham 1965) |
| 137C                      | mt <sup>+</sup> , wild type strain                                                                                                                                              | TAP medium or HS under HL conditions                                                                                                       | (Goldschmidt-Clermont et al. 1990)                                                                                             |
| H13                       | chloroplast mutant; deletion of <i>tscA</i> gene                                                                                                                                | TAP medium under LL conditions                                                                                                             | (Goldschmidt-Clermont et al. 1990)                                                                                             |
| L135F                     | mt <sup>+</sup> ; nuclear class C <i>trans</i> -splicing mutant; from UV mutagenesis of 137C                                                                                    | TAP medium under LL conditions                                                                                                             | (Goldschmidt-Clermont et al. 1990, Hahn et al. 1998)                                                                           |
| A18                       | mt <sup>+</sup> ; nuclear class A <i>trans</i> -splicing mutant; from transformation of mutant <i>arg7</i> with plasmid pARG7.8                                                 | TAP medium under LL conditions                                                                                                             | (Debuchy et al. 1989, Perron et al. 1999)                                                                                      |
| $\Delta$ <i>raa6</i>      | mt <sup>-</sup> , nuclear class A <i>trans</i> -splicing mutant; reduced cell wall, derived from transformation of CC-406 <i>cw15</i> with plasmid pHyg3                        | TAP medium under LL conditions                                                                                                             | Jacobs, Glanz, Kück personal communication                                                                                     |
| R4T                       | mutant <i>raa4</i> expressing <i>RAA4::TAP</i> fusion gene                                                                                                                      | TAP medium or HS under HL conditions                                                                                                       | (Jacobs et al. 2013)                                                                                                           |
| TR72:75                   | <i>cw15</i> , mt <sup>-</sup> ; nuclear mutant; reduced cell wall, defect in PSI, class C <i>trans</i> -splicing mutant; from transformation of arg-cw15 with plasmid pARG7.8□3 | TAP medium under LL conditions                                                                                                             | (Hahn et al. 1998, Balczun et al. 2005)                                                                                        |
| RT2T                      | mutant L135F expressing <i>RAT2::TAP</i> fusion gene                                                                                                                            | TAP medium or HS under HL conditions                                                                                                       | this work                                                                                                                      |
| R2T                       | mutant A18 expressing <i>RAA2::TAP</i> fusion gene                                                                                                                              | TAP medium or HS under HL conditions                                                                                                       | this work                                                                                                                      |
| R6T                       | mutant <i>raa6</i> expressing <i>RAA6::TAP</i> fusion gene                                                                                                                      | TAP medium or HS under HL conditions                                                                                                       | this work                                                                                                                      |
| R4T $\Delta$ <i>tscA</i>  | Integrated <i>RAA4::TAP</i> ; chloroplast mutant; deletion of <i>tscA</i> gene                                                                                                  | TAP medium with spectinomycin under LL conditions                                                                                          | this work                                                                                                                      |
| RT2T $\Delta$ <i>tscA</i> | Integrated <i>RAT2::TAP</i> ; chloroplast mutant; deletion of <i>tscA</i> gene                                                                                                  | TAP medium with spectinomycin under LL conditions                                                                                          | this work                                                                                                                      |

**Supplementary Table 4: Plasmids used in this study.**

| Plasmid        | Characteristics                                                                                                                                                                                          | Reference                  |
|----------------|----------------------------------------------------------------------------------------------------------------------------------------------------------------------------------------------------------|----------------------------|
| P78H3          | Cosmid from <i>C. reinhardtii</i> wild type library                                                                                                                                                      | (Zhang et al. 1994)        |
| pBatTL         | spec <sup>R</sup> , amp <sup>R</sup>                                                                                                                                                                     | (Nagai et al. 2002)        |
| pCM6           | 2.3 kb RAA2 gDNA in pDrive                                                                                                                                                                               | this work                  |
| pCM10          | codon optimized <i>TAP-tag</i> gene in pCrg1                                                                                                                                                             | (Jacobs et al. 2013)       |
| pCM43          | 5' <i>psbD-aadA-3'rbcl</i> cassette in pRS426                                                                                                                                                            | this work                  |
| pCM45          | full length <i>tscA</i> gene in pDrive                                                                                                                                                                   | this work                  |
| pCM49          | 5' <i>psbD-aadA-3'rbcl</i> cassette in pCM45: <i>Pacl</i> , <i>Stul</i>                                                                                                                                  | this work                  |
| pCM51          | gDNA of <i>Rat1::3xHA</i> in pCrg1                                                                                                                                                                       | this work                  |
| pOR11          | gDNA of RAA6 in pDrive                                                                                                                                                                                   |                            |
| pRAT2::TAP     | gDNA of <i>RAT2::TAP</i> under control of <i>HSP70A/5'RBCS2</i> and <i>3'LHCB1</i>                                                                                                                       | this work                  |
| pRAA2::TAP     | gDNA of <i>RAA2::TAP</i> under control of <i>HSP70A/5'RBCS2</i> and <i>3'LHCB1</i>                                                                                                                       | this work                  |
| pRAA6::TAP     | gDNA of <i>RAA6::TAP</i> under control of <i>HSP70A/5'RBCS2</i> and <i>3'LHCB1</i>                                                                                                                       | this work                  |
| pCM57          | R12 from pIG637.1 : <i>Lgul</i> , <i>Ehel</i> in pRS426; 0.9 kb; <i>BglII</i> , <i>Nsil</i> -fragment was used as a <i>tscA</i> probe                                                                    | this work                  |
| pCM59          | 5' <i>psbD-aadA-3'rbcl</i> cassette in pCM57 : <i>Pacl</i> , and deletion of 0.8 kb internal fragment of <i>tscA</i> ; 1.7 kb <i>BglII</i> , <i>Nsil</i> -fragment was used as a <i>tscA::aadA</i> probe | this work                  |
| pDrive         | amp <sup>R</sup> , kan <sup>R</sup> , <i>lacZ</i>                                                                                                                                                        | Qiagen, Hilden, Germany    |
| pGAD_RbcS1     | <i>RBCS1</i> -cDNA in pGAD424/ <i>EcoRI</i> (BD Biosciences Clontech)                                                                                                                                    | (Glanz et al. 2012)        |
| pIG637.1       | <i>C. reinhardtii</i> chloroplast DNA <i>EcoRI</i> restriction fragment R12 in pT3T7, contains the <i>tscA</i> gene                                                                                      | (Herdenberger et al. 1994) |
| pIG3197-3      | <i>3xHA</i> in pCrg1                                                                                                                                                                                     | this work                  |
| pRS426         | <i>URA3</i> , <i>lacZ_a</i> , Amp <sup>R</sup>                                                                                                                                                           | (Christianson et al. 1992) |
| pGADT7         | <i>ADH1(p)::gal4-AD::LEU2</i>                                                                                                                                                                            | Clontech                   |
| pGBKT7         | <i>ADH1(p)::gal4-BD::TRP1</i>                                                                                                                                                                            | Clontech                   |
| pGADT7_Raa1-A  | 1.7 kb fragment of <i>RAA1</i> cDNA in pGADT7                                                                                                                                                            | (Jacobs et al. 2013)       |
| pGBKT7_Raa1-A  | 1.7 kb fragment of <i>RAA1</i> cDNA in pGBKT7                                                                                                                                                            | (Jacobs et al. 2013)       |
| pGADT7_Raa2-FL | 1.1 kb fragment of <i>RAA2</i> cDNA in pGADT7                                                                                                                                                            | this work                  |
| pGBKT7_Raa2-FL |                                                                                                                                                                                                          | this work                  |
| pGADT7_Rat2-FL | 2 kb fragment of <i>RAT2</i> cDNA in pGADT7                                                                                                                                                              | (Jacobs et al. 2013)       |
| pGADT7_Rat2-A  | 0.7 kb fragment of <i>RAT2</i> cDNA in pGADT7                                                                                                                                                            | (Jacobs et al. 2013)       |
| pGADT7_Rat2-B  | 0.8 kb fragment of <i>RAT2</i> cDNA in pGADT7                                                                                                                                                            | (Jacobs et al. 2013)       |
| pGBKT7_Rat2-FL | 2 kb fragment of <i>RAT2</i> cDNA in pGBKT7                                                                                                                                                              | (Jacobs et al. 2013)       |
| pGBKT7_Rat2-A  | 0.7 kb fragment of <i>RAT2</i> cDNA in pGBKT7                                                                                                                                                            | (Jacobs et al. 2013)       |
| pGBKT7_Rat2-B  | 0.8 kb fragment of <i>RAT2</i> cDNA in pGBKT7                                                                                                                                                            | (Jacobs et al. 2013)       |
| pGADT7_Raa3-FL | 5.1 kb fragment of <i>RAA3</i> cDNA in pGADT7                                                                                                                                                            | this work                  |
| pGBKT7_Raa3-FL | 5.1 kb fragment of <i>RAA3</i> cDNA in pGBKT7                                                                                                                                                            | (Jacobs et al. 2013)       |

|                |                                               |                      |
|----------------|-----------------------------------------------|----------------------|
| pGBKT7_Raa3-A  | 3.3 kb fragment of <i>RAA3</i> cDNA in pGBKT7 | (Jacobs et al. 2013) |
| pGBKT7_Raa3-B  | 1.8 kb fragment of <i>RAA3</i> cDNA in pGBKT7 | (Jacobs et al. 2013) |
| pGBKT7_Raa3-C  | 1.8 kb fragment of <i>RAA3</i> cDNA in pGBKT7 | (Jacobs et al. 2013) |
| pGBKT7_Raa3-D  | 1.4 kb fragment of <i>RAA3</i> cDNA in pGBKT7 | (Jacobs et al. 2013) |
| pGADT7_Raa4-FL | 3.2 kb fragment of <i>RAA4</i> cDNA in pGADT7 | (Jacobs et al. 2013) |
| pGBKT7_Raa4-A  | 1.6 kb fragment of <i>RAA4</i> cDNA in pGADT7 | (Jacobs et al. 2013) |
| pGBKT7_Raa4-B  | 1.6 kb fragment of <i>RAA4</i> cDNA in pGADT7 | (Jacobs et al. 2013) |
| pGBKT7_Raa4-FL | 3.2 kb fragment of <i>RAA4</i> cDNA in pGBKT7 | (Jacobs et al. 2013) |
| pGADT7_Raa6-A  | 1.6 kb fragment of <i>RAA6</i> cDNA in pGADT7 | this work            |
| pGBKT7_Raa6-A  | 1.6 kb fragment of <i>RAA6</i> cDNA in pGBKT7 | this work            |
| pGADT7_Raa6-B  | 1.8 kb fragment of <i>RAA6</i> cDNA in pGADT7 | this work            |
| pGBKT7_Raa6-B  | 1.8 kb fragment of <i>RAA6</i> cDNA in pGBKT7 | this work            |
| pGADT7_Raa6-FL | 3.4 kb fragment of <i>RAA6</i> cDNA in pGADT7 | this work            |
| pGBKT7_Raa6-FL | 3.4 kb fragment of <i>RAA6</i> cDNA in pGBKT7 | this work            |
| pGADT7_Raa8-A  | 0.5 kb fragment of <i>RAA8</i> cDNA in pGADT7 | this work            |
| pGADT7_Raa8-B  | 1.4 kb fragment of <i>RAA8</i> cDNA in pGADT7 | this work            |
| pGADT7_Raa8-C  | 0.5 kb fragment of <i>RAA8</i> cDNA in pGADT7 | this work            |
| pGADT7_Raa8-D  | 0.9 kb fragment of <i>RAA8</i> cDNA in pGADT7 | this work            |
| pGBKT7_Raa8-B  | 1.4 kb fragment of <i>RAA8</i> cDNA in pGADT7 | this work            |
| pGBKT7_Raa8-D  | 0.9 kb fragment of <i>RAA8</i> cDNA in pGADT7 | this work            |

**Supplementary Table 5: Oligonucleotides used in this study.**

| Oligonucleotide          | Sequence (5' → 3')                                           | Reference                    |
|--------------------------|--------------------------------------------------------------|------------------------------|
| for_Rat2_IF              | TTACAAGAGAGCTAGCATGCAGTCTCCCGCGCTAG                          | this work                    |
| 815.3D                   | CATCGAAGTCGGGCATGA                                           | Balczun, pers. communication |
| for_Rat2-F2              | TACTGAGCGCCAGCTTC                                            | (Jacobs et al. 2013)         |
| rev_Rat2-F2              | TGCCGCCGCTGTTGCTGCTTTG                                       | (Jacobs et al. 2013)         |
| for_Rat2-F3              | AGGTCCAGCAAAACCCAAAG                                         | (Jacobs et al. 2013)         |
| rev_Rat2-F4              | TGTTGCCCAACGGGGATGAG                                         | (Jacobs et al. 2013)         |
| for_Rat2-F4              | GTTTGTGACGGCCGAGGAG                                          | (Jacobs et al. 2013)         |
| rev_Rat2-IF              | CTTAGATCTGCTAGCCCCGGCTGCGGACTGTTCC                           | this work                    |
| for_hsp70A_HR            | CCCTCGAGGTCGACGGTATCGATAAAGCTCGCTGAGGC<br>TTGACAT            | this work                    |
| rev_5'rbcS2_HR           | ACGGCGCTAGCGCGGGAGACTGCATGCTAGCTCTCTT<br>GTAAAAAA            | this work                    |
| for_TAP_3'lhcb_HR        | AGCCCTGGAACAGTCCGCAGCCGGGGCTAGCAGATCT<br>AAGCGCCG            | this work                    |
| rev_3'lhcb_HR            | CACCGCGGTGGCGGCCGCTCTAGAAGATATCATCGATG<br>GCCTACC            | this work                    |
| for_5'UTR_psbD           | GACGGTATCGATAAGCTTGATATCGAGGCCTATGAAATT<br>AAATGGATATTTGGTAC | this work                    |
| for_aadA                 | ATGCCTCGGGCATCCAAGCAGCAAG                                    | this work                    |
| for_rbcL                 | GATCACCAAGGTAGTCGGCAAATAAAGCTTGTACTCAA<br>GCTCGTAACGAA       | this work                    |
| rev_3'UTR_rbcL           | GGTGGCGGCCGCTCTAGAAGTGTGTTAATTAATACAT<br>CCGCTTTAGTATGTTACT  | this work                    |
| rev_aadA                 | TTATTTGCCGACTACCTTGGTGATC                                    | this work                    |
| rev_psbD                 | CTTGCTGCTTGGATGCCCGAGGCATTGCGTGTATCTCC<br>AAAATAAAAAAA       | this work                    |
| for_tscA                 | TACTCCGAAGCAGGCAGTTG                                         | this work                    |
| rev_tscA                 | GTATAGCAGCGAGATGCTAC                                         | this work                    |
| OOR_59                   | TCTAGAATGGCGGAGGAGCTGCGG                                     | this work                    |
| OOR_60                   | TCTAGACAGCCGCATTTCCGCCGC                                     | this work                    |
| for_Raa2_TAP             | TCTAGATAAAACAATTGGGTCCAAGAGCCGC                              | this work                    |
| rev_Raa2_TAP             | TCTAGAATGCGCGTGCCGTTGCAGCAC                                  | this work                    |
| for_Rat1-IF              | TACAAGAGAGCTAGCATGTACGCTTGAAATCTC                            | this work                    |
| rev_Rat2-IF              | GTAAGATCTGCTAGCCCCGCCGGCGCCCATCTG                            | this work                    |
| for_3xHA                 | AGAGCTAGCAGATCTTACCCCTACGACGTGCC                             | this work                    |
| pGAD_Raa6_Infu1          | CAGATTACGCTCATATGCAGCAGCTGGGGACCAGT                          | this work                    |
| rev_pGAD_Raa6_Infu2      | CACCCGGGTGGAATTCTCACAGCCGCATTTCCGCCGC                        | this work                    |
| pGAD_Raa6_Infu3          | CAGATTACGCTCATATGATGGCGGAGGAGCTGCGGCCG                       | this work                    |
| pGAD_Raa6_Infu4          | CACCCGGGTGGAATTCTCACGCGGCATTCCTAGCTTCC<br>TG                 | this work                    |
| for_29701_Fragmen<br>t_2 | GAGCAGCAGGAAACACAAGG                                         | this work                    |
| for-IF-Raa8-F1           | CAGATTACGCTCATATGGCAGGCGTTATGTACAG                           | this work                    |
| rev-IF-Raa8-F1           | CACCCGGGTGGAATTCCTATAGCCACTCCATGCTA                          | this work                    |
| for-IF-Raa8-F2           | CAGATTACGCTCATATGCAGTTGGTGCGGGTGTTG                          | this work                    |
| rev-IF-Raa8-F2           | CACCCGGGTGGAATTCCTACAGGTCTCGCTGCCA                           | this work                    |
| IF-42B-for               | CAGATTACGCTCATATGTGTAGCATGGAGTGCTAC                          | this work                    |
| IF-42B-rev               | CACCCGGGTGGAATTCTTACGAGGACATGGCGCT                           | this work                    |

|                  |                                      |           |
|------------------|--------------------------------------|-----------|
| IF-46A-for       | CAGATTACGCTCATATGTGCGGCTGCTTACAAACC  | this work |
| IF-46A-rev       | CACCCGGGTGGAATTCTTACCCTTCCTGTACATAAC | this work |
| OOR_48           | GCAGATGCTCATGACTTTGAC                | this work |
| OOR_98           | AAAGAATTTGAGCCGTGTGCAG               | this work |
| OOR_99           | TGAGTAGGGTCACTTAACCAAG               | this work |
| OOR_113          | AGGTCGCACGCCCATTTTTTC                | this work |
| OOR_114          | TAGTACTCCAGAGCGCGAAG                 | this work |
| tscA_RT_for      | CCAACCTTCAGCTAGGTTTGATG              | this work |
| tscA_RT_rev      | TAAGCCCTTCTCTTTCTGCAAG               | this work |
| rev_psaA_Ex2Int2 | TCGTGTGCGCACCCACTTAAC                | this work |
| for_Ch1          | CTAGGCGCCAATGCAAGCAG                 | this work |
| for_raa2_Ex2     | CGGCCTTATGCTGTTGTGCT                 | this work |
| rev_Raa2_Ex3     | CTCTTCGCTAAGCGGTGACG                 | this work |
| taptag2          | AGATCTCTTGGGGGCCTGTGCGCC             | this work |
| 29701_RT1_rev    | GTATGGTCCGCTGCATTCCC                 | this work |
| OOR_107          | GCTGGCTGGCCGACACATGC                 | this work |



**Supplementary Table 6: LC-MS data of each TAP experiment**

List of proteins purified by tandem affinity purification and identified by LC-MS. The results for each purification are presented in a separate worksheet. All proteins are reported with the accession number, the percentage of the protein sequence coverage ( $\Sigma$ Coverage), the number of identified unique peptides ( $\Sigma$ # Unique Peptides), the number of identified proteins in a protein group ( $\Sigma$ # Peptides), the number of peptide spectrum matches ( $\Sigma$ # PSMs), the number of amino acids (# AAs), the molecular weight (MW [kDa]), and the calculated isoelectric point (calc. pI).
